# Supplementary material for: Head Impact Biomechanics Across Men's and Women's Contact Sports: A Comparative and Clustering Analysis
Source: Research Square preprint supplement (doi:10.21203/rs.3.rs-6566803/v1), 2025-05-16
Supplement: Supplementary file 1 [file 9c236b67fdf64885a8a428f3.docx]

**Supplementary Tables:**

**Supplementary Table 1** Peak Kinematics Comparisons across all sports. AP: anterior posterior, LR: left right, IS: inferior superior, Cor: Coronal, Sag: Sagittal, Hor: Horizontal, R: Resultant

| **Axis** | | **Men’s Hockey** | **Men’s Football** | **Women’s Rugby** | **Women’s Soccer** |
| --- | --- | --- | --- | --- | --- |
| **PLAAP (g)** | Median | 7.9 | 10.8 | 9.1 | 7.8 |
| 75th percentile | 10.9 | 15.9 | 12.3 | 9.6 |
| 95th percentile | 19.3 | 27.5 | 25.6 | 14.9 |
| **PLALR (g)** | Median | 8.6 | 10.6 | 10.4 | 3.5 |
| 75th percentile | 14.3 | 15.7 | 14.4 | 5.2 |
| 95th percentile | 30.7 | 30.2 | 29.4 | 9.3 |
| **PLAIS (g)** | Median | 8.6 | 9.4 | 6.7 | 11.2 |
| 75th percentile | 11.5 | 13.1 | 10.7 | 13.6 |
| 95th percentile | 18.6 | 25.3 | 23.1 | 18.5 |
| **PLAR (g)** | Median | 14.1 | 17.5 | 14.8 | 13.1 |
| 75th percentile | 18.7 | 24.6 | 21.2 | 15.7 |
| 95th percentile | 39.1 | 38.8 | 45.8 | 22.4 |
| **PAVcor (rad/s)** | Median | 5.8 | 6.8 | 5.6 | 2.1 |
| 75th percentile | 9.7 | 11.1 | 8.2 | 3.6 |
| 95th percentile | 15.5 | 23.2 | 13.3 | 7.3 |
| **PAVsag (rad/s)** | Median | 5.1 | 6.3 | 4.8 | 4.2 |
| 75th percentile | 8.6 | 9.2 | 7.4 | 5.8 |
| 95th percentile | 14.1 | 16.8 | 13.8 | 8.7 |
| **PAVhor (rad/s)** | Median | 5.7 | 5.4 | 5.5 | 2.3 |
| 75th percentile | 8.2 | 8.1 | 8.6 | 4.1 |
| 95th percentile | 15.1 | 16.1 | 14.6 | 8.5 |
| **PAVR**  **(rad/s)** | Median | 10.6 | 11.1 | 9.7 | 5.5 |
| 75th percentile | 14.8 | 15.6 | 13.2 | 7.6 |
| 95th percentile | 21.1 | 27.2 | 20.2 | 12.1 |
| **PAAcor (rad/s2)** | Median | 718 | 1332 | 620 | 323 |
| 75th percentile | 1275 | 3308 | 1051 | 593 |
| 95th percentile | 2707 | 8180 | 2309 | 1286 |
| **PAAsag (rad/s2)** | Median | 573 | 965 | 512 | 708 |
| 75th percentile | 1020 | 1806 | 862 | 1037 |
| 95th percentile | 3866 | 4147 | 2031 | 2025 |
| **PAAhor (rad/s2)** | Median | 504 | 749 | 553 | 263 |
| 75th percentile | 826 | 1470 | 882 | 557 |
| 95th percentile | 1836 | 3452 | 1879 | 1398 |
| **PAAR**  **(rad/s2)** | Median | 982 | 1789 | 1009 | 786 |
| 75th percentile | 1816 | 3706 | 1602 | 1347 |
| 95th percentile | 4372 | 8437 | 3081 | 2492 |

**Supplementary Table 2** Peak Kinematics Comparisons with Adjusted P-Values. Asterisks denote significance. AP: anterior posterior, LR: left right, IS: inferior superior, Cor: Coronal, Sag: Sagittal, Hor: Horizontal, R: Resultant

|  | **Kinematics** | **Axis** | **Men’s Hockey** | **Men’s Football** | **Women’s Rugby** | **Women’s Soccer** |
| --- | --- | --- | --- | --- | --- | --- |
| **Men’s Hockey** | **PLA** | **AP** | - | << 0.001* | 0.118 | 0.990 |
| **LR** | - | 0.002* | 0.164 | << 0.001* |
| **IS** | - | 0.042 | 0.561 | < 0.001* |
| **R** |  | < 0.001* | 0.331 | 0.024 |
| **PAV** | **Cor.** | - | 0.209 | 0.999 | << 0.001* |
| **Sag.** | - | 0.012 | 0.990 | < 0.001* |
| **Hor.** | - | 0.999 | 0.990 | << 0.001* |
| **R** |  | 0.990 | 0.890 | << 0.001* |
| **PAA** | **Cor.** | - | << 0.001* | 0.960 | << 0.001* |
| **Sag.** | - | < 0.001* | 0.584 | 0.001* |
| **Hor.** | - | < 0.001* | 0.999 | < 0.001* |
| **R** |  | < 0.001* | 0.999 | 0.002* |
| **Men’s Football** | **PLA** | **AP** | - | - | < 0.001* | << 0.001* |
| **LR** | - | - | 0.468 | << 0.001* |
| **IS** | - | - | < 0.001* | < 0.001* |
| **R** |  |  | 0.026 | << 0.001* |
| **PAV** | **Cor.** | - | - | < 0.001* | << 0.001* |
| **Sag.** | - | - | < 0.001* | << 0.001* |
| **Hor.** | - | - | 0.999 | << 0.001* |
| **R** |  |  | 0.032 | << 0.001* |
| **PAA** | **Cor.** | - | - | << 0.001* | << 0.001* |
| **Sag.** | - | - | << 0.001* | < 0.001* |
| **Hor.** | - | - | < 0.001* | << 0.001* |
| **R** |  |  | << 0.001* | << 0.001* |
| **Women’s Rugby** | **PLA** | **AP** | - | - | - | 0.018 |
| **LR** | - | - | - | << 0.001* |
| **IS** | - | - | - | << 0.001* |
| **R** |  |  |  | << 0.001* |
| **PAV** | **Cor.** | - | - | - | << 0.001* |
| **Sag.** | - | - | - | 0.001* |
| **Hor.** | - | - | - | << 0.001* |
| **R** |  |  |  | << 0.001* |
| **PAA** | **Cor.** | - | - | - | << 0.001* |
| **Sag.** | - | - | - | < 0.001* |
| **Hor.** | - | - | - | << 0.001* |
| **R** |  |  |  | < 0.001* |
| **Women’s Soccer** | **PLA** | **AP** | - | - | - | - |
| **LR** | - | - | - | - |
| **IS** | - | - | - | - |
| **R** |  |  |  |  |
| **PAV** | **Cor.** | - | - | - | - |
| **Sag.** | - | - | - | - |
| **Hor.** | - | - | - | - |
| **R** |  |  |  |  |
| **PAA** | **Cor.** | - | - | - | - |
| **Sag.** | - | - | - | - |
| **Hor.** | - | - | - | - |
| **R** |  |  |  |  |

**Supplementary Table 3** Linear and angular impulse duration for all sports

|  | **Impulse Duration** | **Men’s Hockey** | **Men’s Football** | **Women’s Rugby** | **Women’s Soccer** |
| --- | --- | --- | --- | --- | --- |
| **Men’s Hockey** | **Linear** | - | < 0.001* | 0.119 | < 0.001* |
| **Angular** | - | < 0.001* | 0.999 | 0.001* |
| **Men’s Football** | **Linear** | - | - | 0.025 | 0.796 |
| **Angular** | - | - | < 0.001* | 0.191 |
| **Women’s Rugby** | **Linear** | - | - | - | < 0.001* |
| **Angular** | - | - | - | <0.001* |
| **Women’s Soccer** | **Linear** | - | - | - | - |
| **Angular** | - | - | - | - |

**Supplementary Table 4** rSagittal and rCoronal values for all sports

|  | **Coupling Ratio** | **Men’s Hockey** | **Men’s Football** | **Women’s Rugby** | **Women’s Soccer** |
| --- | --- | --- | --- | --- | --- |
| **Men’s Hockey** | **rSagittal** | - | 0.001* | 0.001* | 0.999 |
| **rCoronal** | - | < 0.001* | 0.999 | 0.005* |
| **Men’s Football** | **rSagittal** | - | - | 0.990 | 0.005* |
| **rCoronal** | - | - | < 0.001* | 0.979 |
| **Women’s Rugby** | **rSagittal** | - | - | - | < 0.001* |
| **rCoronal** | - | - | - | 0.001 |
| **Women’s Soccer** | **rSagittal** | - | - | - | - |
| **rCoronal** | - | - | - | - |
